# Supplementary material for: High performance single-molecule magnets, Orbach or Raman relaxation suppression?
Source: Royal Society of Chemistry journal article supplement (doi:10.1039/d0qi00487a), 2020-01-01
Supplement: d0qi00487a1.pdf [file d0qi00487a1.pdf]

SUPPORTING INFORMATION FOR

**High Performance Single-Molecule Magnets,  
Orbach or Raman Relaxation Suppression?**

Alejandro Castro-Alvarez,<sup>†</sup> Leonel Llanos,<sup>‡</sup> Yolimar Gil,<sup>§</sup> Daniel Aravena<sup>\*,‡</sup>

<sup>†</sup> Departamento de Química de los Materiales, Facultad de Química y Biología, Universidad de Santiago de Chile, Casilla 40, Correo 33, Santiago, Chile

<sup>§</sup> Departamento de Química Inorgánica y Analítica, Facultad de Ciencias Químicas y Farmacéuticas, Universidad de Chile, Santiago, Chile.

Email: daniel.aravena.p@usach.cl

|                                                                                    |      |
|------------------------------------------------------------------------------------|------|
| <b>Table S1.</b> CASSCF g-values and g-vectors.....                                | S-2  |
| <b>Table S2.</b> Experimental and <i>ab initio</i> $U_{eff}$ and $\tau_{QT}$ ..... | S-11 |
| <b>Figure S1.</b> <i>ab initio</i> demagnetization pathways.....                   | S-12 |
| Example for the calculation of tunneling rates (UandTau).....                      | S-14 |

## CASSCF g-VALUES AND g-VECTORS

**Table S1.** CASSCF+QDPT g-values and g-vectors for the eight Kramers' doublets corresponding to the  ${}^6\text{H}_{15/2}$  ground multiplet for all calculated molecules.

| Molecule | KD | E (cm <sup>-1</sup> ) |           | gx        | gy        | gz        |           |
|----------|----|-----------------------|-----------|-----------|-----------|-----------|-----------|
| <b>1</b> | 1  | 0.0                   | g-values  |           | 0.000001  | 0.000001  | 19.887923 |
|          |    |                       | g-vectors | X         | 0.789588  | 0.536789  | 0.297335  |
|          |    |                       |           | Y         | 0.613638  | -0.690705 | -0.382592 |
|          |    |                       | Z         | 0.000000  | 0.484546  | -0.874766 |           |
|          | 2  | 554.9                 | g-values  |           | 0.000056  | 0.000062  | 16.962891 |
|          |    |                       | g-vectors | X         | 0.849545  | 0.444755  | -0.283665 |
|          |    |                       |           | Y         | -0.324623 | 0.864635  | 0.383441  |
|          |    |                       | Z         | 0.415805  | -0.233666 | 0.878924  |           |
|          | 3  | 835.0                 | g-values  |           | 0.004565  | 0.004851  | 14.391656 |
|          |    |                       | g-vectors | X         | 0.620005  | 0.734743  | 0.275219  |
|          |    |                       |           | Y         | 0.771441  | -0.506905 | -0.384612 |
|          |    |                       | Z         | -0.143081 | 0.450777  | -0.881095 |           |
|          | 4  | 1002.7                | g-values  |           | 0.003224  | 0.011944  | 11.777382 |
|          |    |                       | g-vectors | X         | 0.803891  | 0.504601  | -0.314862 |
|          |    |                       |           | Y         | -0.374783 | 0.840810  | 0.390611  |
|          |    |                       | Z         | 0.461842  | -0.196004 | 0.865035  |           |
|          | 5  | 1164.6                | g-values  |           | 0.168207  | 0.191341  | 9.072690  |
|          |    |                       | g-vectors | X         | 0.662391  | 0.671127  | -0.332906 |
|          |    |                       |           | Y         | -0.555406 | 0.738145  | 0.382970  |
|          |    |                       | Z         | 0.502755  | -0.068778 | 0.861689  |           |
|          | 6  | 1333.7                | g-values  |           | 0.753501  | 1.142417  | 6.323126  |
|          |    |                       | g-vectors | X         | 0.927252  | 0.167798  | -0.334736 |
|          |    |                       |           | Y         | -0.033292 | 0.927372  | 0.372656  |
|          |    |                       | Z         | 0.372956  | -0.334401 | 0.865494  |           |
|          | 7  | 1478.5                | g-values  |           | 3.330960  | 5.168677  | 6.159056  |
|          |    |                       | g-vectors | X         | -0.288025 | 0.776481  | -0.560464 |
|          |    |                       |           | Y         | 0.378024  | 0.629926  | 0.678448  |
|          |    |                       | Z         | 0.879852  | -0.016459 | -0.474963 |           |
|          | 8  | 1588.6                | g-values  |           | 0.863738  | 4.340274  | 15.723468 |
|          |    |                       | g-vectors | X         | -0.301173 | 0.629140  | -0.716573 |
|          |    |                       |           | Y         | 0.384375  | 0.767806  | 0.512571  |
|          |    |                       | Z         | 0.872669  | -0.121060 | -0.473068 |           |
| <b>3</b> | 1  | 0.0                   | g-values  |           | 0.000002  | 0.000002  | 19.888309 |
|          |    |                       | g-vectors | X         | -0.290393 | 0.739193  | 0.607673  |
|          |    |                       |           | Y         | 0.191682  | -0.577232 | 0.793764  |

|           |        |           |           |           |           |           |
|-----------|--------|-----------|-----------|-----------|-----------|-----------|
|           |        |           | Z         | 0.937512  | 0.346984  | 0.025934  |
| 2         | 567.5  | g-values  |           | 0.000191  | 0.000196  | 16.957858 |
|           |        | g-vectors | X         | -0.159935 | 0.787234  | 0.595552  |
|           |        |           | Y         | 0.059126  | -0.594596 | 0.801848  |
|           |        |           | Z         | 0.985355  | 0.163456  | 0.048551  |
| 3         | 868.1  | g-values  |           | 0.003331  | 0.003556  | 14.371674 |
|           |        | g-vectors | X         | 0.802841  | -0.051453 | -0.593969 |
|           |        |           | Y         | -0.595748 | -0.030714 | -0.802584 |
|           |        |           | Z         | 0.023053  | 0.998203  | -0.055311 |
| 4         | 1056.6 | g-values  |           | 0.010477  | 0.017071  | 11.762507 |
|           |        | g-vectors | X         | 0.717004  | 0.321980  | -0.618251 |
|           |        |           | Y         | -0.569117 | -0.241741 | -0.785918 |
|           |        |           | Z         | -0.402506 | 0.915364  | 0.009915  |
| 5         | 1234.7 | g-values  |           | 0.393699  | 0.426134  | 9.075076  |
|           |        | g-vectors | X         | 0.564477  | 0.518559  | 0.642232  |
|           |        |           | Y         | -0.435034 | -0.474326 | 0.765350  |
|           |        |           | Z         | 0.701507  | -0.711415 | -0.042155 |
| 6         | 1416.3 | g-values  |           | 0.048478  | 0.889233  | 6.347958  |
|           |        | g-vectors | X         | 0.080274  | 0.752726  | 0.653421  |
|           |        |           | Y         | -0.012568 | -0.654720 | 0.755767  |
|           |        |           | Z         | 0.996694  | -0.068880 | -0.043097 |
| 7         | 1569.0 | g-values  |           | 3.382820  | 5.264047  | 5.444159  |
|           |        | g-vectors | X         | -0.582848 | 0.454983  | 0.673260  |
|           |        |           | Y         | -0.808908 | -0.246185 | -0.533911 |
|           |        |           | Z         | -0.077174 | -0.855794 | 0.511527  |
| 8         | 1680.8 | g-values  |           | 0.909184  | 4.731612  | 15.435581 |
|           |        | g-vectors | X         | 0.614496  | 0.744239  | -0.261731 |
|           |        |           | Y         | 0.788799  | -0.573798 | 0.220345  |
|           |        |           | Z         | 0.013809  | -0.341854 | -0.939652 |
| <b>5a</b> | 1      | 0.0       | g-values  | 0.000003  | 0.000005  | 19.864176 |
|           |        |           | g-vectors | X         | -0.974758 | -0.186804 |
|           |        |           |           | Y         | -0.222660 | 0.853621  |
|           |        |           |           | Z         | 0.016408  | 0.486247  |
|           |        |           |           |           |           | -0.873667 |
| 2         | 452.9  | g-values  |           | 0.000071  | 0.000078  | 17.007812 |
|           |        | g-vectors | X         | 0.976305  | 0.166608  | -0.138099 |
|           |        |           | Y         | 0.212108  | -0.863237 | 0.458074  |
|           |        |           | Z         | -0.042893 | -0.476512 | -0.878121 |
| 3         | 742.1  | g-values  |           | 0.001174  | 0.001298  | 14.383616 |
|           |        | g-vectors | X         | -0.183213 | 0.972574  | 0.143290  |
|           |        |           | Y         | -0.884396 | -0.099415 | -0.456027 |
|           |        |           | Z         | -0.429275 | -0.210275 | 0.878355  |

|           |        |           |           |           |           |           |           |
|-----------|--------|-----------|-----------|-----------|-----------|-----------|-----------|
| 4         | 942.0  | g-values  |           | 0.035959  | 0.040509  | 11.742249 |           |
|           |        | g-vectors | X         | -0.473969 | 0.875664  | 0.092554  |           |
|           |        |           | Y         | -0.794490 | -0.379962 | -0.473724 |           |
|           |        |           | Z         | -0.379656 | -0.298063 | 0.875797  |           |
| 5         | 1111.2 | g-values  |           | 0.615072  | 0.694564  | 9.048552  |           |
|           |        | g-vectors | X         | 0.972068  | 0.224394  | 0.068790  |           |
|           |        |           | Y         | -0.161632 | 0.852554  | -0.497018 |           |
|           |        |           | Z         | -0.170175 | 0.472016  | 0.865009  |           |
| 6         | 1254.9 | g-values  |           | 0.152029  | 1.563730  | 6.217820  |           |
|           |        | g-vectors | X         | 0.830753  | 0.551623  | -0.074575 |           |
|           |        |           | Y         | 0.502521  | -0.685599 | 0.526712  |           |
|           |        |           | Z         | 0.239418  | -0.475043 | -0.846766 |           |
| 7         | 1349.3 | g-values  |           | 2.603855  | 8.389052  | 8.978059  |           |
|           |        | g-vectors | X         | 0.118021  | 0.824092  | -0.554025 |           |
|           |        |           | Y         | -0.471943 | 0.537435  | 0.698881  |           |
|           |        |           | Z         | 0.873694  | 0.178986  | 0.452353  |           |
| 8         | 1482.2 | g-values  |           | 0.241799  | 0.735500  | 18.215197 |           |
|           |        | g-vectors | X         | 0.116691  | 0.345681  | 0.931068  |           |
|           |        |           | Y         | -0.479284 | -0.801487 | 0.357640  |           |
|           |        |           | Z         | 0.869868  | -0.487979 | 0.072153  |           |
| <b>5b</b> | 1      | 0.0       | g-values  |           | 0.000008  | 0.000009  | 19.862022 |
|           |        |           | g-vectors | X         | -0.868340 | -0.493351 | -0.050903 |
|           |        |           |           | Y         | 0.453144  | -0.747451 | -0.485774 |
|           |        |           |           | Z         | 0.201610  | -0.444884 | 0.872601  |
| 2         | 439.1  | g-values  |           | 0.000270  | 0.000291  | 17.022831 |           |
|           |        | g-vectors | X         | 0.254674  | 0.966992  | -0.008261 |           |
|           |        |           | Y         | -0.838035 | 0.216432  | -0.500855 |           |
|           |        |           | Z         | -0.482534 | 0.134478  | 0.865492  |           |
| 3         | 730.2  | g-values  |           | 0.009214  | 0.010431  | 14.334595 |           |
|           |        | g-vectors | X         | -0.098347 | 0.995149  | 0.002439  |           |
|           |        |           | Y         | -0.858579 | -0.083611 | -0.505818 |           |
|           |        |           | Z         | -0.503160 | -0.051840 | 0.862637  |           |
| 4         | 939.3  | g-values  |           | 0.134420  | 0.143446  | 11.684571 |           |
|           |        | g-vectors | X         | 0.990895  | 0.039975  | 0.128564  |           |
|           |        |           | Y         | -0.026028 | -0.880014 | 0.474235  |           |
|           |        |           | Z         | 0.132095  | -0.473263 | -0.870961 |           |
| 5         | 1116.4 | g-values  |           | 0.797073  | 1.099230  | 9.004690  |           |
|           |        | g-vectors | X         | 0.981254  | -0.046323 | 0.187067  |           |
|           |        |           | Y         | -0.128964 | -0.879143 | 0.458776  |           |
|           |        |           | Z         | 0.143206  | -0.474301 | -0.868637 |           |
| 6         | 1255.5 | g-values  |           | 3.467982  | 5.515909  | 5.750712  |           |
|           |        | g-vectors | X         | 0.961007  | 0.226315  | -0.158892 |           |

|          |   |        |           |   |           |           |           |
|----------|---|--------|-----------|---|-----------|-----------|-----------|
|          |   |        |           | Y | -0.164995 | 0.930407  | 0.327291  |
|          |   |        |           | Z | 0.221905  | -0.288313 | 0.931469  |
|          | 7 | 1352.9 | g-values  |   | 1.854668  | 4.846297  | 11.861981 |
|          |   |        | g-vectors | X | -0.076234 | 0.715263  | -0.694686 |
|          |   |        |           | Y | -0.503295 | 0.573839  | 0.646068  |
|          |   |        |           | Z | 0.860746  | 0.398884  | 0.316242  |
|          | 8 | 1503.6 | g-values  |   | 0.088300  | 0.190309  | 18.427845 |
|          |   |        | g-vectors | X | -0.122687 | 0.636091  | -0.761798 |
|          |   |        |           | Y | -0.525264 | 0.609656  | 0.593648  |
|          |   |        |           | Z | 0.842049  | 0.472978  | 0.259318  |
| <b>6</b> | 1 | 0.0    | g-values  |   | 0.000002  | 0.000003  | 19.876809 |
|          |   |        | g-vectors | X | 0.501577  | 0.478567  | 0.720690  |
|          |   |        |           | Y | 0.814925  | -0.540985 | -0.207925 |
|          |   |        |           | Z | 0.290376  | 0.691598  | -0.661342 |
|          | 2 | 564.5  | g-values  |   | 0.000384  | 0.000411  | 16.943151 |
|          |   |        | g-vectors | X | 0.472161  | 0.512936  | 0.716910  |
|          |   |        |           | Y | 0.848790  | -0.484073 | -0.212672 |
|          |   |        |           | Z | 0.237950  | 0.708922  | -0.663935 |
|          | 3 | 946.3  | g-values  |   | 0.045788  | 0.046104  | 14.251066 |
|          |   |        | g-vectors | X | 0.393466  | 0.588916  | -0.705948 |
|          |   |        |           | Y | -0.662937 | 0.713767  | 0.225945  |
|          |   |        |           | Z | 0.636945  | 0.379098  | 0.671257  |
|          | 4 | 1151.3 | g-values  |   | 0.051343  | 0.544391  | 11.014433 |
|          |   |        | g-vectors | X | 0.716404  | -0.135650 | -0.684371 |
|          |   |        |           | Y | 0.415687  | 0.870790  | 0.262544  |
|          |   |        |           | Z | 0.560330  | -0.472572 | 0.680225  |
|          | 5 | 1180.8 | g-values  |   | 0.482729  | 1.140047  | 16.340079 |
|          |   |        | g-vectors | X | 0.749743  | 0.365842  | -0.551402 |
|          |   |        |           | Y | -0.228859 | -0.638498 | -0.734809 |
|          |   |        |           | Z | -0.620894 | 0.677111  | -0.394983 |
|          | 6 | 1208.7 | g-values  |   | 2.922972  | 5.232123  | 9.987416  |
|          |   |        | g-vectors | X | 0.812811  | 0.120522  | 0.569924  |
|          |   |        |           | Y | 0.064497  | 0.953729  | -0.293669 |
|          |   |        |           | Z | -0.578947 | 0.275455  | 0.767428  |
|          | 7 | 1227.3 | g-values  |   | 0.627393  | 6.466121  | 9.977723  |
|          |   |        | g-vectors | X | 0.903670  | -0.149790 | 0.401179  |
|          |   |        |           | Y | 0.372475  | 0.737173  | -0.563771 |
|          |   |        |           | Z | -0.211291 | 0.658892  | 0.721954  |
|          | 8 | 1243.6 | g-values  |   | 1.266472  | 8.848429  | 10.956542 |
|          |   |        | g-vectors | X | -0.310862 | 0.935155  | -0.169853 |
|          |   |        |           | Y | 0.515056  | 0.315938  | 0.796806  |

|           |   |        |           |           |           |           |           |
|-----------|---|--------|-----------|-----------|-----------|-----------|-----------|
|           |   |        |           | Z         | 0.798800  | 0.160213  | -0.579870 |
| <b>7</b>  | 1 | 0.0    | g-values  |           | 0.000002  | 0.000002  | 19.874402 |
|           |   |        | g-vectors | X         | 0.329538  | 0.002092  | 0.944140  |
|           |   |        |           | Y         | 0.943352  | 0.040184  | -0.329352 |
|           |   |        |           | Z         | -0.038628 | 0.999190  | 0.011269  |
|           | 2 | 464.3  | g-values  |           | 0.000086  | 0.000090  | 17.014156 |
| g-vectors |   |        | X         | 0.324460  | -0.154861 | 0.933137  |           |
|           |   |        | Y         | 0.853798  | -0.376660 | -0.359382 |           |
|           |   |        | Z         | 0.407130  | 0.913316  | 0.010009  |           |
|           | 3 | 731.3  | g-values  |           | 0.002174  | 0.002546  | 14.387818 |
| g-vectors |   |        | X         | 0.006499  | 0.374153  | -0.927344 |           |
|           |   |        | Y         | 0.043416  | 0.926384  | 0.374070  |           |
|           |   |        | Z         | 0.999036  | -0.042692 | -0.010224 |           |
|           | 4 | 906.2  | g-values  |           | 0.019770  | 0.022624  | 11.750820 |
| g-vectors |   |        | X         | 0.257886  | -0.079279 | 0.962917  |           |
|           |   |        | Y         | 0.934428  | -0.232916 | -0.269433 |           |
|           |   |        | Z         | 0.245640  | 0.969260  | 0.014015  |           |
|           | 5 | 1063.2 | g-values  |           | 0.065178  | 0.102958  | 9.099082  |
| g-vectors |   |        | X         | 0.247226  | 0.037922  | 0.968216  |           |
|           |   |        | Y         | 0.943833  | 0.216650  | -0.249485 |           |
|           |   |        | Z         | -0.219225 | 0.975513  | 0.017769  |           |
|           | 6 | 1210.9 | g-values  |           | 1.070477  | 1.183905  | 6.437814  |
| g-vectors |   |        | X         | -0.184651 | 0.202990  | -0.961613 |           |
|           |   |        | Y         | -0.587835 | 0.761315  | 0.273585  |           |
|           |   |        | Z         | 0.787626  | 0.615787  | -0.021253 |           |
|           | 7 | 1327.5 | g-values  |           | 1.985630  | 3.703077  | 4.779321  |
| g-vectors |   |        | X         | -0.212913 | 0.977059  | -0.004911 |           |
|           |   |        | Y         | -0.976607 | -0.212654 | 0.031902  |           |
|           |   |        | Z         | 0.030126  | 0.011589  | 0.999479  |           |
|           | 8 | 1397.6 | g-values  |           | -0.867606 | 4.934478  | 11.588115 |
| g-vectors |   |        | X         | 0.947805  | -0.034333 | -0.316996 |           |
|           |   |        | Y         | -0.318581 | -0.061172 | -0.945920 |           |
|           |   |        | Z         | 0.013085  | 0.997537  | -0.068917 |           |
| <b>8</b>  | 1 | 0.0    | g-values  |           | 0.000003  | 0.000003  | 19.492969 |
|           |   |        | g-vectors | X         | -0.372232 | -0.915534 | 0.152452  |
|           |   |        |           | Y         | 0.533260  | -0.345398 | -0.772226 |
|           |   |        |           | Z         | 0.759656  | -0.206151 | 0.616786  |
|           | 2 | 385.8  | g-values  |           | 0.000176  | 0.000180  | 16.759559 |
| g-vectors |   |        | X         | 0.771871  | 0.609789  | 0.179926  |           |
|           |   |        | Y         | -0.242849 | 0.544322  | -0.802956 |           |
|           |   |        | Z         | -0.587571 | 0.576083  | 0.568233  |           |

|           |        |           |           |           |           |           |           |
|-----------|--------|-----------|-----------|-----------|-----------|-----------|-----------|
| 3         | 624.6  | g-values  |           | 0.001068  | 0.001315  | 14.160659 |           |
|           |        | g-vectors | X         | 0.868683  | 0.458353  | -0.187886 |           |
|           |        |           | Y         | 0.400963  | -0.427870 | 0.810035  |           |
|           |        |           | Z         | 0.290891  | -0.778999 | -0.555466 |           |
| 4         | 797.6  | g-values  |           | 0.024135  | 0.025988  | 11.560561 |           |
|           |        | g-vectors | X         | -0.405565 | 0.901252  | -0.152520 |           |
|           |        |           | Y         | 0.525582  | 0.366445  | 0.767777  |           |
|           |        |           | Z         | 0.747851  | 0.231221  | -0.622299 |           |
| 5         | 935.9  | g-values  |           | 0.430897  | 0.455511  | 8.993341  |           |
|           |        | g-vectors | X         | 0.205107  | 0.972465  | -0.110651 |           |
|           |        |           | Y         | 0.701314  | -0.067167 | 0.709682  |           |
|           |        |           | Z         | 0.682708  | -0.223162 | -0.695779 |           |
| 6         | 1048.6 | g-values  |           | 0.603221  | 1.430876  | 6.268526  |           |
|           |        | g-vectors | X         | 0.164336  | 0.981841  | -0.094775 |           |
|           |        |           | Y         | 0.727685  | -0.055806 | 0.683638  |           |
|           |        |           | Z         | 0.665935  | -0.181312 | -0.723641 |           |
| 7         | 1127.0 | g-values  |           | 2.880222  | 6.791163  | 8.518121  |           |
|           |        | g-vectors | X         | -0.172818 | -0.085553 | 0.981231  |           |
|           |        |           | Y         | 0.810353  | 0.553931  | 0.191019  |           |
|           |        |           | Z         | -0.559876 | 0.828156  | -0.026402 |           |
| 8         | 1201.1 | g-values  |           | 0.508490  | 1.899394  | 17.230422 |           |
|           |        | g-vectors | X         | -0.153205 | 0.691365  | 0.706075  |           |
|           |        |           | Y         | 0.763812  | 0.536193  | -0.359289 |           |
|           |        |           | Z         | -0.626993 | 0.484264  | -0.610220 |           |
| <b>13</b> | 1      | 0.0       | g-values  |           | 0.000018  | 0.000023  | 19.471873 |
|           |        |           | g-vectors | X         | 0.184475  | 0.970720  | -0.153857 |
|           |        |           |           | Y         | -0.980488 | 0.192582  | 0.039434  |
|           |        |           |           | Z         | 0.067909  | 0.143580  | 0.987306  |
| 2         | 393.0  | g-values  |           | 0.007903  | 0.008621  | 16.691997 |           |
|           |        | g-vectors | X         | 0.950469  | -0.271579 | -0.151173 |           |
|           |        |           | Y         | 0.279072  | 0.959790  | 0.030363  |           |
|           |        |           | Z         | 0.136848  | -0.071048 | 0.988041  |           |
| 3         | 576.2  | g-values  |           | 1.943614  | 3.902767  | 14.908371 |           |
|           |        | g-vectors | X         | -0.106774 | -0.783588 | 0.612037  |           |
|           |        |           | Y         | 0.100972  | -0.620919 | -0.777344 |           |
|           |        |           | Z         | 0.989143  | -0.021201 | 0.145418  |           |
| 4         | 612.7  | g-values  |           | 0.240349  | 2.583270  | 6.727381  |           |
|           |        | g-vectors | X         | 0.852889  | 0.431220  | 0.294328  |           |
|           |        |           | Y         | 0.445688  | -0.894971 | 0.019729  |           |
|           |        |           | Z         | 0.271923  | 0.114352  | -0.955501 |           |
| 5         | 620.0  | g-values  |           | 0.629598  | 4.532908  | 8.189100  |           |
|           |        | g-vectors | X         | -0.663864 | 0.625457  | 0.409985  |           |

|           |       |           |           |   |           |           |           |
|-----------|-------|-----------|-----------|---|-----------|-----------|-----------|
|           |       |           |           | Y | 0.058765  | 0.590149  | -0.805153 |
|           |       |           |           | Z | -0.745541 | -0.510420 | -0.428533 |
| 6         | 660.3 | g-values  |           |   | 0.889914  | 2.604185  | 6.813811  |
|           |       | g-vectors | X         |   | 0.310226  | -0.867452 | -0.388956 |
|           |       |           | Y         |   | 0.944516  | 0.327692  | 0.022513  |
|           |       |           | Z         |   | 0.107929  | -0.374359 | 0.920981  |
| 7         | 699.3 | g-values  |           |   | 0.108929  | 2.334253  | 12.015781 |
|           |       | g-vectors | X         |   | -0.007517 | 0.920263  | 0.391229  |
|           |       |           | Y         |   | 0.824535  | -0.215651 | 0.523104  |
|           |       |           | Z         |   | 0.565762  | 0.326514  | -0.757167 |
| 8         | 706.9 | g-values  |           |   | 0.524841  | 2.777654  | 13.636737 |
|           |       | g-vectors | X         |   | -0.093097 | 0.989601  | -0.109651 |
|           |       |           | Y         |   | 0.730864  | -0.006865 | -0.682488 |
|           |       |           | Z         |   | -0.676144 | -0.143678 | -0.722625 |
| <b>14</b> | 1     | 0.0       | g-values  |   | 0.000010  | 0.000038  | 19.432563 |
|           |       |           | g-vectors | X | 0.012926  | 0.999423  | -0.031419 |
|           |       |           |           | Y | -0.999916 | 0.012933  | 0.000030  |
|           |       |           |           | Z | 0.000436  | 0.031416  | 0.999506  |
| 2         | 312.8 | g-values  |           |   | 0.016803  | 0.017645  | 16.672374 |
|           |       | g-vectors | X         |   | -0.997373 | 0.001288  | 0.072426  |
|           |       |           | Y         |   | 0.001290  | 0.999999  | -0.000009 |
|           |       |           | Z         |   | -0.072426 | 0.000085  | -0.997374 |
| 3         | 565.7 | g-values  |           |   | 0.331687  | 0.644426  | 13.317208 |
|           |       | g-vectors | X         |   | -0.997881 | 0.000400  | 0.065071  |
|           |       |           | Y         |   | 0.000398  | 1.000000  | -0.000031 |
|           |       |           | Z         |   | -0.065071 | -0.000005 | -0.997881 |
| 4         | 643.9 | g-values  |           |   | 0.525699  | 1.838965  | 16.091409 |
|           |       | g-vectors | X         |   | 0.169394  | -0.985548 | -0.000193 |
|           |       |           | Y         |   | -0.000057 | 0.000186  | -1.000000 |
|           |       |           | Z         |   | 0.985548  | 0.169394  | -0.000024 |
| 5         | 692.5 | g-values  |           |   | 0.719981  | 2.421257  | 13.137876 |
|           |       | g-vectors | X         |   | -0.993261 | -0.115903 | -0.000204 |
|           |       |           | Y         |   | -0.000190 | -0.000135 | 1.000000  |
|           |       |           | Z         |   | -0.115903 | 0.993261  | 0.000112  |
| 6         | 719.0 | g-values  |           |   | 2.808931  | 4.633468  | 8.820187  |
|           |       | g-vectors | X         |   | -0.789975 | -0.000267 | 0.613139  |
|           |       |           | Y         |   | -0.000458 | 1.000000  | -0.000154 |
|           |       |           | Z         |   | -0.613138 | -0.000402 | -0.789975 |
| 7         | 761.6 | g-values  |           |   | 1.906388  | 2.215257  | 15.170984 |
|           |       | g-vectors | X         |   | -0.319779 | -0.000119 | 0.947492  |
|           |       |           | Y         |   | -0.000754 | 1.000000  | -0.000129 |



|           |   |       |           |           |           |           |
|-----------|---|-------|-----------|-----------|-----------|-----------|
|           |   |       | Z         | -0.947492 | -0.000756 | -0.319779 |
|           | 8 | 926.0 | g-values  | 0.053073  | 0.073520  | 19.202293 |
|           |   |       | g-vectors | X         | -0.415237 | 0.000144  |
|           |   |       |           | Y         | 0.000281  | 1.000000  |
|           |   |       |           | Z         | 0.909713  | -0.000243 |
| <b>15</b> | 1 | 0.0   | g-values  | 0.005917  | 0.008835  | 19.435605 |
|           |   |       | g-vectors | X         | 0.695498  | -0.019043 |
|           |   |       |           | Y         | 0.043158  | 0.998951  |
|           |   |       |           | Z         | 0.717231  | -0.041645 |
|           | 2 | 265.1 | g-values  | 0.293512  | 0.460094  | 16.416916 |
|           |   |       | g-vectors | X         | -0.698233 | 0.007894  |
|           |   |       |           | Y         | -0.016622 | 0.999491  |
|           |   |       |           | Z         | -0.715677 | -0.030915 |
|           | 3 | 413.1 | g-values  | 3.250595  | 4.940944  | 13.012518 |
|           |   |       | g-vectors | X         | 0.677979  | 0.731377  |
|           |   |       |           | Y         | 0.065086  | 0.040146  |
|           |   |       |           | Z         | 0.732194  | -0.680791 |
|           | 4 | 476.5 | g-values  | 1.109208  | 5.432737  | 8.712560  |
|           |   |       | g-vectors | X         | -0.101471 | 0.681266  |
|           |   |       |           | Y         | -0.993091 | -0.112542 |
|           |   |       |           | Z         | 0.058944  | -0.723333 |
|           | 5 | 561.1 | g-values  | 0.553895  | 4.974616  | 12.094861 |
|           |   |       | g-vectors | X         | 0.651659  | 0.200020  |
|           |   |       |           | Y         | -0.025503 | -0.958282 |
|           |   |       |           | Z         | -0.758084 | 0.204177  |
|           | 6 | 595.6 | g-values  | 2.565678  | 4.501510  | 10.601969 |
|           |   |       | g-vectors | X         | -0.547358 | 0.735144  |
|           |   |       |           | Y         | 0.067929  | 0.515349  |
|           |   |       |           | Z         | 0.834137  | 0.440430  |
|           | 7 | 647.6 | g-values  | 0.404884  | 1.904744  | 16.273842 |
|           |   |       | g-vectors | X         | -0.489168 | 0.729242  |
|           |   |       |           | Y         | 0.332766  | 0.663118  |
|           |   |       |           | Z         | 0.806214  | 0.168763  |
|           | 8 | 667.9 | g-values  | 0.077851  | 2.113944  | 16.488411 |
|           |   |       | g-vectors | X         | 0.916646  | 0.091265  |
|           |   |       |           | Y         | -0.370706 | 0.558156  |
|           |   |       |           | Z         | -0.149453 | -0.824701 |
| <b>17</b> | 1 | 0.0   | g-values  | 0.000641  | 0.000812  | 19.446300 |
|           |   |       | g-vectors | X         | 0.109886  | -0.134341 |
|           |   |       |           | Y         | -0.981096 | 0.144138  |
|           |   |       |           | Z         | 0.159299  | 0.980396  |

|   |       |           |   |           |           |           |
|---|-------|-----------|---|-----------|-----------|-----------|
| 2 | 216.6 | g-values  |   | 0.016797  | 0.020627  | 16.933402 |
|   |       | g-vectors | X | 0.034284  | 0.110225  | -0.993315 |
|   |       |           | Y | -0.998945 | -0.026616 | -0.037432 |
|   |       |           | Z | -0.030564 | 0.993550  | 0.109196  |
| 3 | 352.9 | g-values  |   | 0.284446  | 0.379226  | 14.209798 |
|   |       | g-vectors | X | 0.108166  | -0.207300 | -0.972279 |
|   |       |           | Y | 0.979241  | 0.190863  | 0.068247  |
|   |       |           | Z | 0.171425  | -0.959478 | 0.223641  |
| 4 | 434.9 | g-values  |   | 2.405283  | 4.001060  | 11.040041 |
|   |       | g-vectors | X | 0.422605  | -0.329313 | -0.844368 |
|   |       |           | Y | 0.903004  | 0.232551  | 0.361254  |
|   |       |           | Z | 0.077393  | -0.915135 | 0.395648  |
| 5 | 464.6 | g-values  |   | 1.716149  | 7.517017  | 9.546554  |
|   |       | g-vectors | X | 0.939491  | -0.326418 | 0.103959  |
|   |       |           | Y | 0.324265  | 0.749467  | -0.577192 |
|   |       |           | Z | 0.110492  | 0.575977  | 0.809964  |
| 6 | 491.5 | g-values  |   | 0.830430  | 3.148175  | 12.401856 |
|   |       | g-vectors | X | 0.948159  | -0.304455 | 0.091111  |
|   |       |           | Y | 0.164723  | 0.225654  | -0.960181 |
|   |       |           | Z | 0.271772  | 0.925412  | 0.264106  |
| 7 | 529.8 | g-values  |   | 0.572503  | 1.229015  | 15.761780 |
|   |       | g-vectors | X | 0.962213  | 0.272108  | -0.010145 |
|   |       |           | Y | -0.050616 | 0.142130  | -0.988553 |
|   |       |           | Z | -0.267551 | 0.951713  | 0.150532  |
| 8 | 650.9 | g-values  |   | 0.032455  | 0.064246  | 18.979931 |
|   |       | g-vectors | X | 0.895614  | -0.339448 | 0.287490  |
|   |       |           | Y | -0.171763 | 0.332270  | 0.927413  |
|   |       |           | Z | -0.410333 | -0.879984 | 0.239282  |

**Table S2.** Comparison between experimental and calculated effective demagnetization barriers and ground state tunneling relaxation time for all calculated systems.

|           | $U_{\text{eff}}/\text{exp}$ (K) | $U_{\text{eff}}/\text{calc}$ (K) | $\log_{10}(\tau)/\text{exp}$ | $\log_{10}(\tau)/\text{calc}$ |
|-----------|---------------------------------|----------------------------------|------------------------------|-------------------------------|
| <b>1</b>  | 2217                            | 1893                             | 4.40                         | 4.88                          |
| <b>3</b>  | 1986                            | 1863                             | 2.65                         | 4.37                          |
| <b>5</b>  | 1848                            | 1731                             | 2.64                         | 3.35                          |
| <b>6</b>  | 1815                            | 1708                             |                              | 3.98                          |
| <b>7</b>  | 1760                            | 1738                             |                              | 4.41                          |
| <b>8</b>  | 1760                            | 1622                             |                              | 3.90                          |
| <b>13</b> | 950                             | 906                              | 0.15                         | 1.94                          |
| <b>14</b> | 944                             | 1041                             | -0.19                        | 2.12                          |
| <b>15</b> | 803                             | 711                              |                              | -3.48                         |
| <b>17</b> | 638                             | 649                              | -1.77                        | -1.15                         |

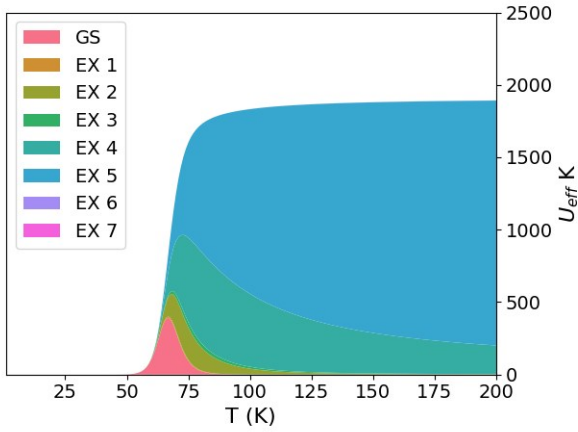

**1**

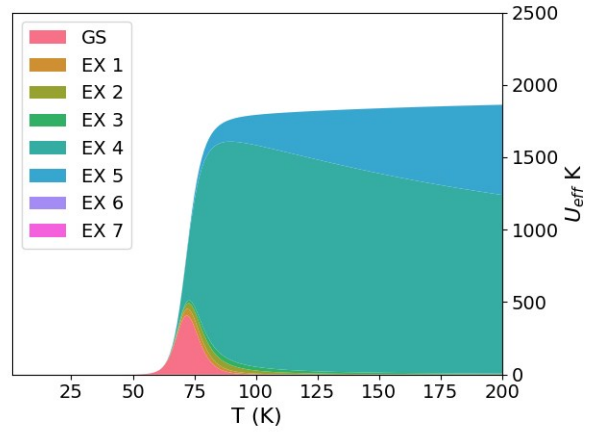

**3**

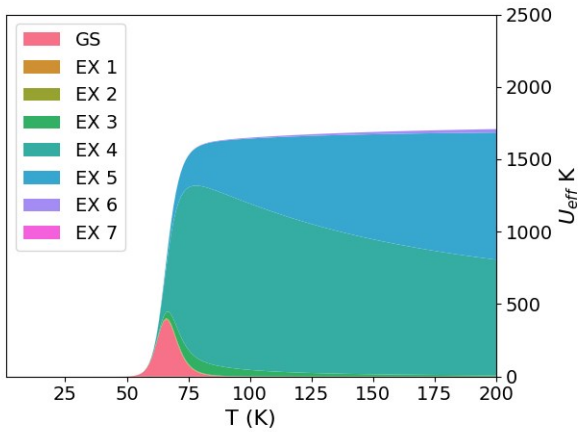

**5a**

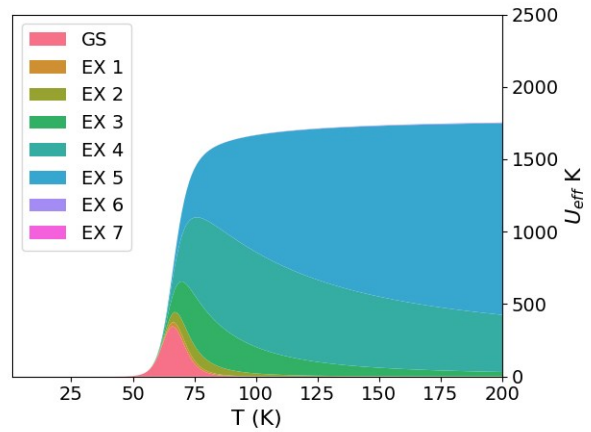

**5b**

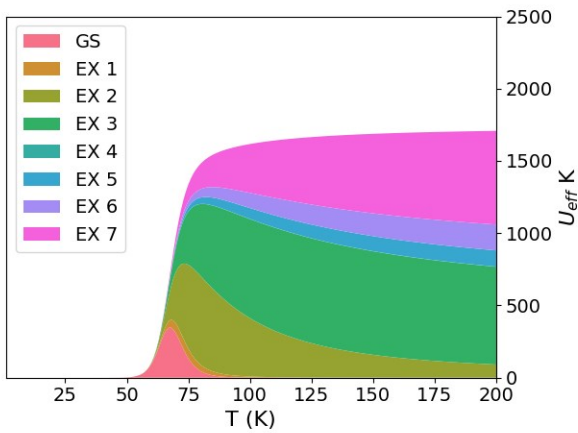

**6**

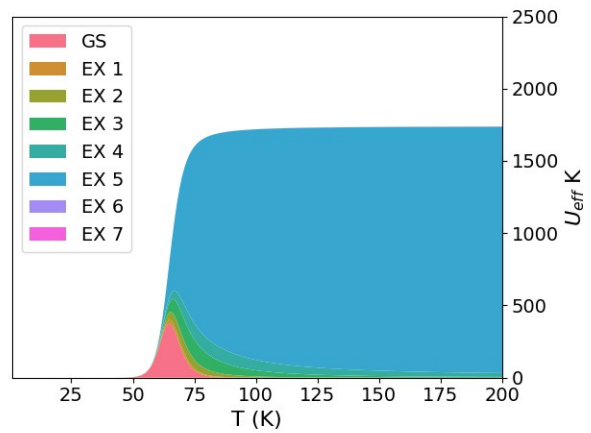

**7**

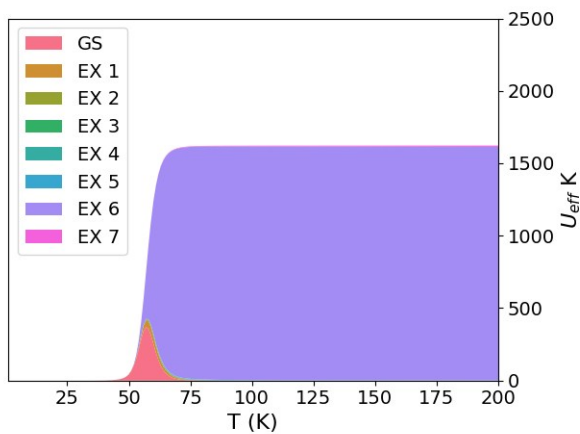

8

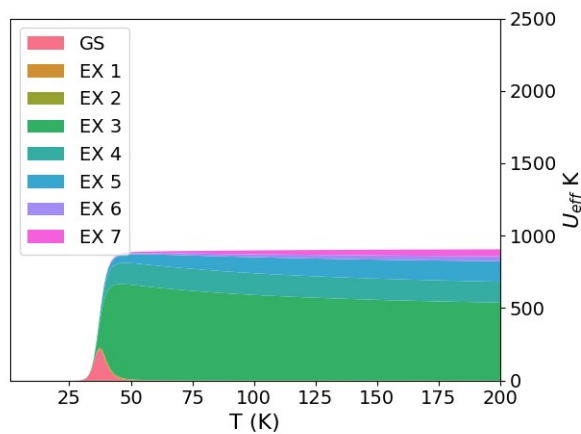

13

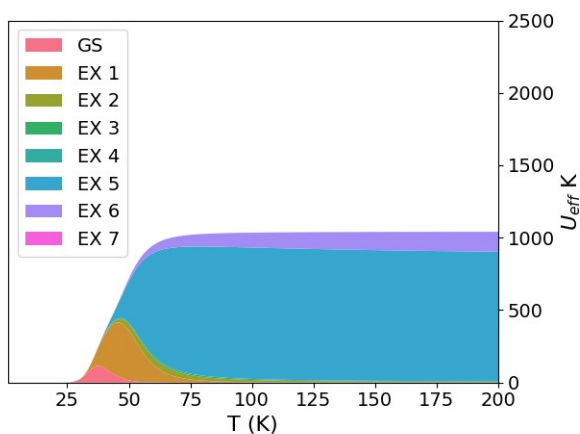

14

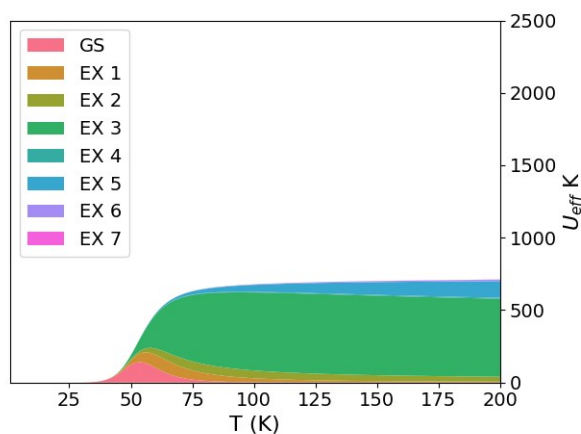

15

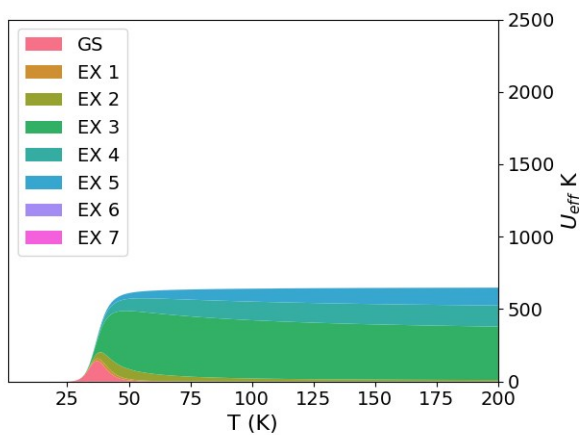

17

**Figure S1.** Effective demagnetization barrier including relative contributions from the ground state (GS) and seven lowest excited states (EX n).

## Example for the calculation of tunneling rates (UandTau)

The calculation of tunneling rates requires state energies, g-values and g-vectors obtained from a CASSCF calculation. In addition, the position of the magnetic ions and their neighbors must be provided by a regular .cif file. Both files serve as input to our program “UandTau”, which can be obtained upon request to the authors.

The relevant parts of the ORCA output are indicated:

### 1) Relativistic state energies are listed as the Eigenvalues of the QDPT matrix.

```
*****
Doing QDPT with ONLY SOC!
*****

Lowest eigenvalue of the SOC matrix: -13311.11927091 Eh
Energy stabilization: -9255.29614 cm-1
Eigenvalues:      cm-1      eV      Boltzmann populations at T = 300.000
K
  0:           0.00          0.0000      4.54e-01
  1:           0.00          0.0000      4.54e-01
  2:          565.68          0.0701      3.01e-02
  3:          565.68          0.0701      3.01e-02
  4:          825.21          0.1023      8.67e-03
  5:          825.21          0.1023      8.67e-03
  6:          979.91          0.1215      4.13e-03
  7:          979.91          0.1215      4.13e-03
  8:         1135.22          0.1407      1.96e-03
  9:         1135.22          0.1407      1.96e-03
 10:         1299.53          0.1611      8.91e-04
 11:         1299.53          0.1611      8.91e-04
 12:         1437.17          0.1782      4.60e-04
 13:         1437.17          0.1782      4.60e-04
 14:         1562.75          0.1938      2.52e-04
 15:         1562.75          0.1938      2.52e-04
```

### 2) For each Kramers' doublet, we must search for the corresponding g-factors and g vectors.

```
-----
KRAMERS PAIR 1
-----

Matrix elements Re<1|S|1>  -0.770999   0.953205   2.178132
Matrix elements Re<1|S|2>   0.001310  -0.001620  -0.003701
Matrix elements Im<1|S|2>   0.000835  -0.001032  -0.002358
Matrix elements Re<1|L|1>  -1.540983   1.900426   4.345677
Matrix elements Re<1|L|2>   0.002619  -0.003229  -0.007384
Matrix elements Im<1|L|2>   0.001668  -0.002057  -0.004704

-----
ELECTRONIC G-MATRIX
-----

g-matrix:
```

|              |            |            |            |          |
|--------------|------------|------------|------------|----------|
| 0.010484     | -0.006679  | -6.169539  |            |          |
| -0.012944    | 0.008247   | 7.618094   |            |          |
| -0.029590    | 0.018851   | 17.413984  |            |          |
| g-factors:   |            |            |            |          |
| 0.000001     | 0.000001   | 19.983669  | iso =      | 6.661224 |
| g-shifts:    |            |            |            |          |
| -2.002318    | -2.002318  | 17.981350  | iso =      | 4.658904 |
| Orientation: |            |            |            |          |
| X            | -0.4602615 | -0.8323733 | -0.3087297 |          |
| Y            | 0.7418828  | -0.5516191 | 0.3812167  |          |
| Z            | -0.4876158 | -0.0535819 | 0.8714125  |          |

### 3) the xyz coordinate of the magnetic center.

```

| 19> actorbs forbs
| 20> rel
| 21> gtensor true
| 22> ndoubgtensor 8
| 23> dosoc true
| 24> end
| 25> end
| 26> * xyz 1 6
| 27> Dy 0.466208642603 3.09356609245 12.8240748266
| 28> C 0.0644682210099 4.83254336403 14.5794295819
| 29> C -1.26857168577 4.53969857176 14.1263920349
| 30> C -1.59477418585 3.19897238631 14.5373982324

```

This is an input file for UandTau, the corresponding cif file “molecule.cif” must be present in the same directory:

```

>RUNMODE single
>NEWJOB
-> ncenters 1
-> dilution_ratio 1
-> dilution_repetitions 1
-> print regular
-> InputMode gfactors
-> ciffile molecule.cif
-> jobtitle job1
---> center 0
--> ncoord 1
Dy 0.466208642603 3.09356609245 12.8240748266
--> end ncoord
--> energies 8
0.00
565.68
825.21
979.91

```

```

1135.22
1299.53
1437.17
1562.75
--> end energies
--> NKD 8
0.000001      0.000001      19.983669
  X      -0.4602615      -0.8323733      -0.3087297
  Y       0.7418828      -0.5516191       0.3812167
  Z     -0.4876158      -0.0535819       0.8714125
  0.000090      0.000095      17.167746
  X     -0.9345989       0.2087017      -0.2880425
  Y     -0.3142182      -0.8639265       0.3935707
  Z     -0.1667087       0.4583390       0.8730026
  0.002568      0.002861      14.557224
  X       0.9023782       0.3289903       0.2783502
  Y       0.4200429      -0.8158282      -0.3974774
  Z       0.0963198       0.4755940      -0.8743757
  0.017737      0.023243      11.908042
  X     -0.6820395       0.6566458       0.3219291
  Y       0.5480870       0.7504075      -0.3694445
  Z     -0.4841722      -0.0755306      -0.8717066
  0.084852      0.129838       9.210357
  X     -0.1168235       0.9286263       0.3521441
  Y       0.9030312       0.2469064      -0.3515279
  Z     -0.4133847       0.2769304      -0.8674230
  1.092539      1.287135       6.411262
  X     -0.1697691       0.9184407      -0.3572746
  Y     -0.9371860      -0.0383618       0.3467142
  Z       0.3047308       0.3936942       0.8672624
  3.141881      6.217129       7.951621
  X     -0.2911190       0.3156801      -0.9031034
  Y       0.3837230       0.9032593       0.1920399
  Z       0.8763598      -0.2906351      -0.3840896
  0.659835      2.755765      17.026882
  X     -0.3133455       0.8288292      -0.4635265
  Y       0.3784035       0.5566582       0.7395555
  Z       0.8709910       0.0563363      -0.4880582
--> end NKD
---> end center 0
>ENDJOB

```
